# Supplementary material for: Ultra-long cycle life and binder-free manganese-cobalt oxide supercapacitor electrodes through photonic nanostructuring
Source: Royal Society of Chemistry journal article supplement (doi:10.1039/d0ra08510c), 2020-01-01
Supplement: d0ra08510c1.pdf [file d0ra08510c1.pdf]

## Electronic Supplementary Information

| Voltage (V) | Envelope width ( $\mu\text{s}$ ) | $\mu\text{pulses}$ | Fire rate (Hz) | Pulse fluence ( $\text{J}/\text{cm}^2$ ) | No. of pulses |
|-------------|----------------------------------|--------------------|----------------|------------------------------------------|---------------|
| 670         | 1950                             | 8                  | 1.2            | 5.6                                      | 3             |

**Table S1.** Thin film processing parameters.

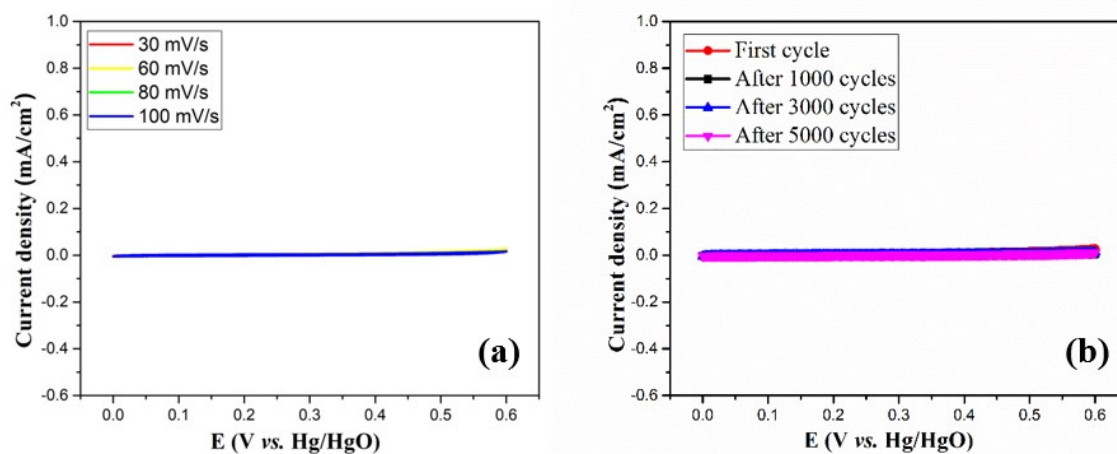

**Figure S1.** CV curves for Pt-Si substrate (a) at various scan rates and (b) at 50 mV/s scan rate after various number of CV cycles.

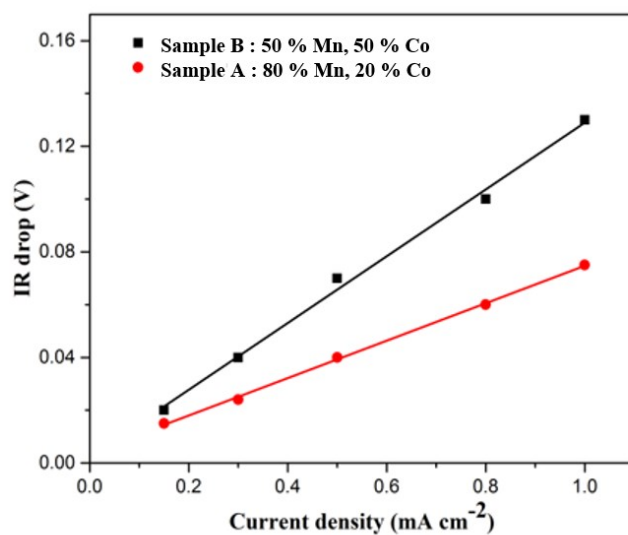

**Figure S2.** IR drops at various current densities for both the samples.

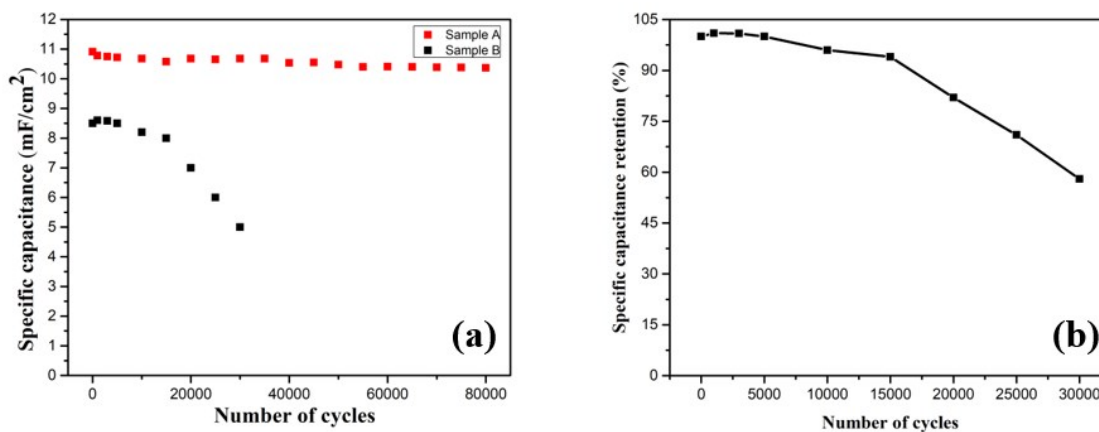

**Figure S3.** (a) Specific capacitance vs. number of GCD cycles for Samples A and B and (b) Specific capacitance retention percentage vs. number of GCD cycles for Sample B.
